# Supplementary material for: A new type of anion receptor: pyrrolyl quinones
Source: Royal Society of Chemistry journal article supplement (doi:10.1039/c3ra46594b), 2013-12-18
Supplement: c3ra46594b.pdf [file c3ra46594b.pdf]

## A new type of anion receptor: Pyrrolyl quinones

Melissa Tapia-Juárez,<sup>a</sup> J. Betzabe González-Campos,<sup>a</sup> Claudia Contreras-Celedón,<sup>a</sup> David Corona,<sup>b</sup> Erick Cuevas-Yañez,<sup>b</sup> and Luis Chacón-García \*<sup>✉<sup>a</sup></sup>

<sup>a</sup>Laboratorio de Diseño Molecular, Instituto de Investigaciones Químico Biológicas Universidad Michoacana de San Nicolás de Hidalgo, Morelia, Mich., 58066, México

<sup>b</sup> Centro Conjunto de Investigación en Química Sustentable UAEM-UNAM, Carretera Toluca-Atlacomulco Km. 14.5, Toluca, Estado de México 52000, México

email: [lchacon@umich.mx](mailto:lchacon@umich.mx)

C\_MTJ\_70-2  
MTJ 70-2  
Dr. Luis Chacon  
24-oct-12

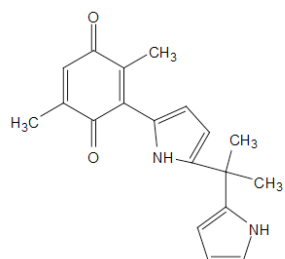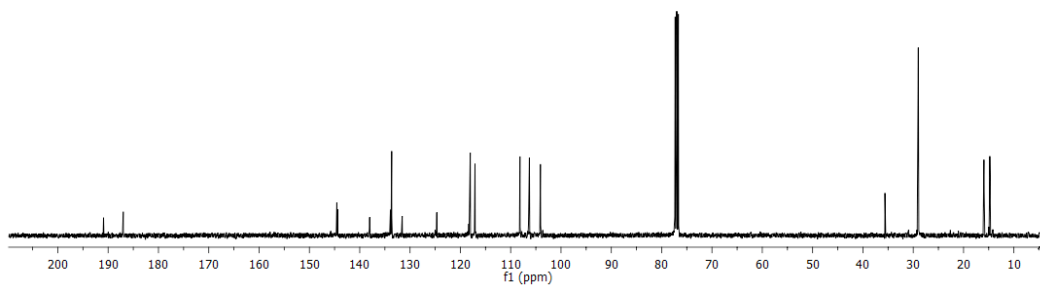

1. <sup>1</sup>H NMR of 2 (400 MHz) in CDCl<sub>3</sub>.

H\_MTJ\_70-2  
MTJ 70-2  
Dr. Luis Chacon  
24-oct-12

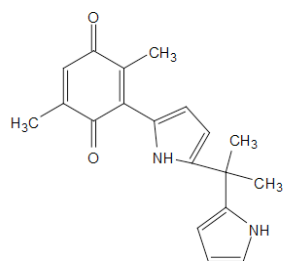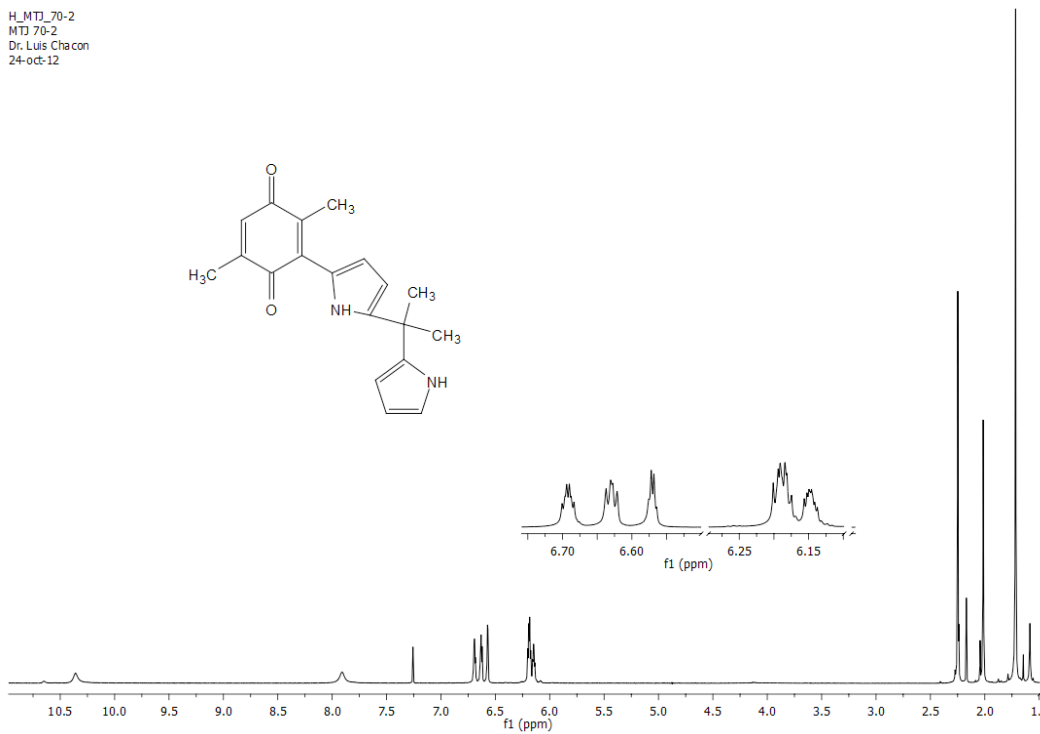

2. <sup>13</sup>C NMR of 2 (130MHz) in CDCl<sub>3</sub>.

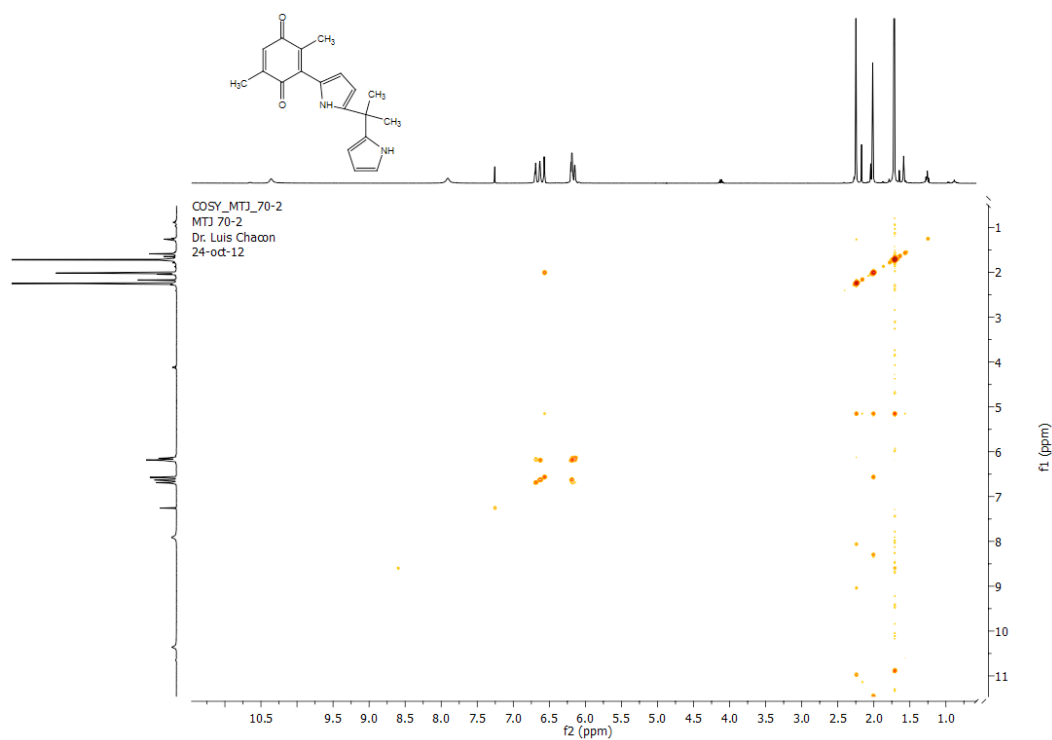

3. Cosy NMR (400 MHz) of 2 in CDCl<sub>3</sub>.

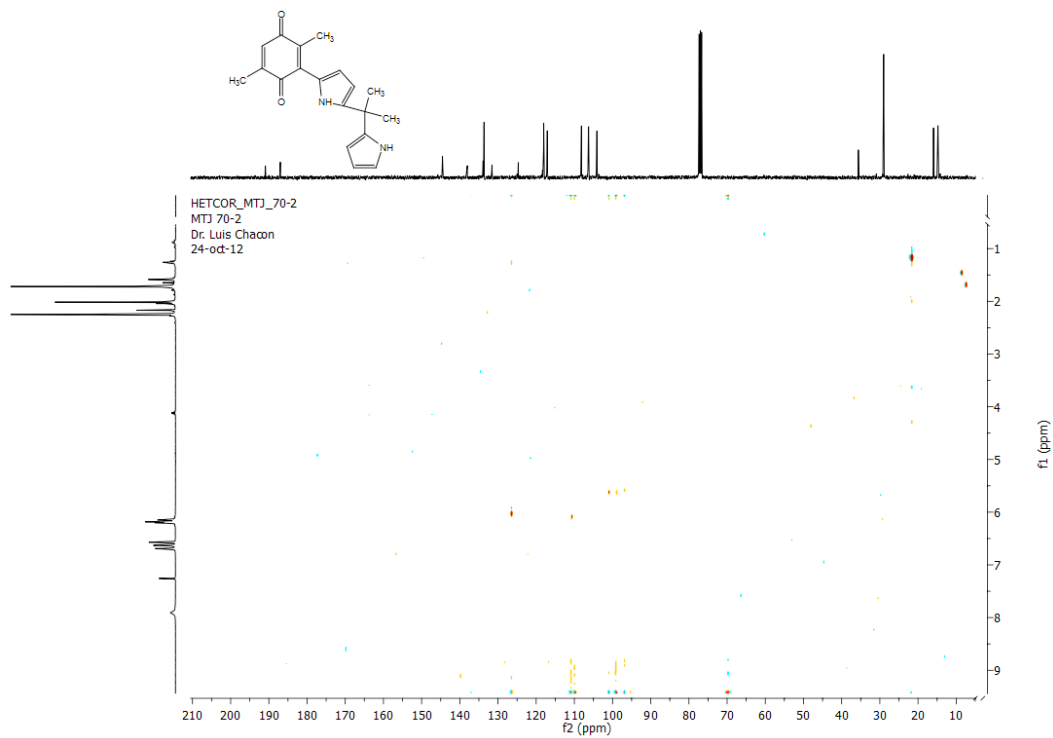

4. Hetcor NMR of 2 in CDCl<sub>3</sub>.

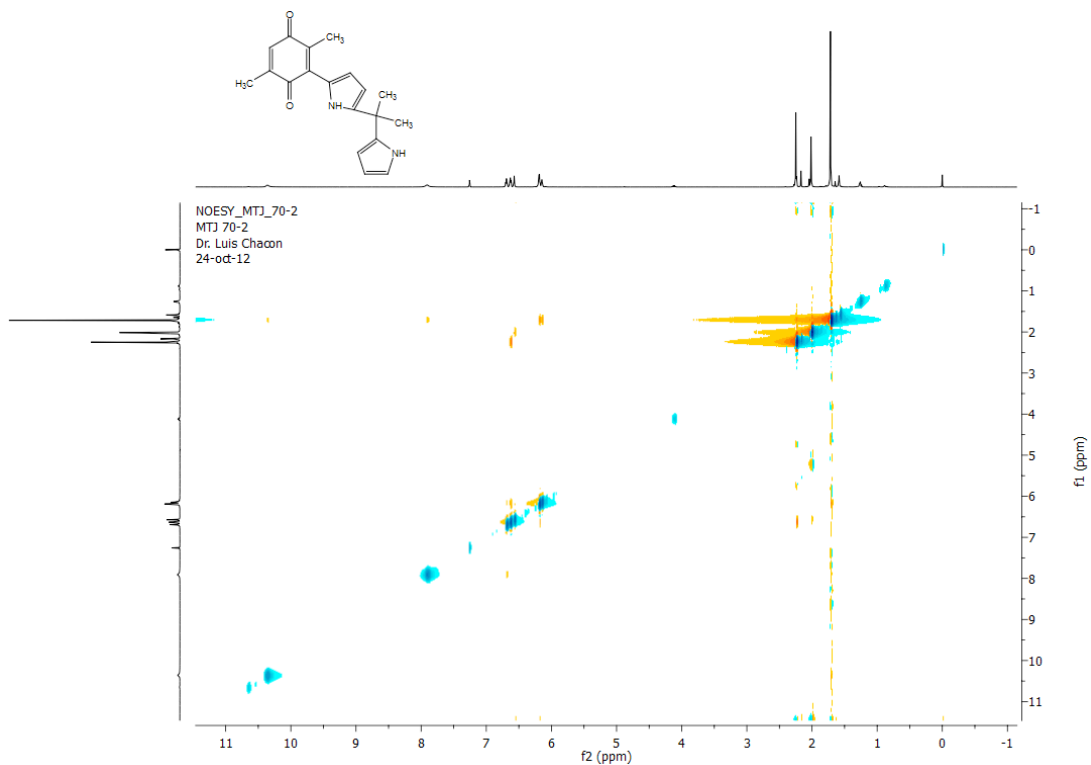

5. Noesy NMR of 2 in  $\text{CDCl}_3$ .

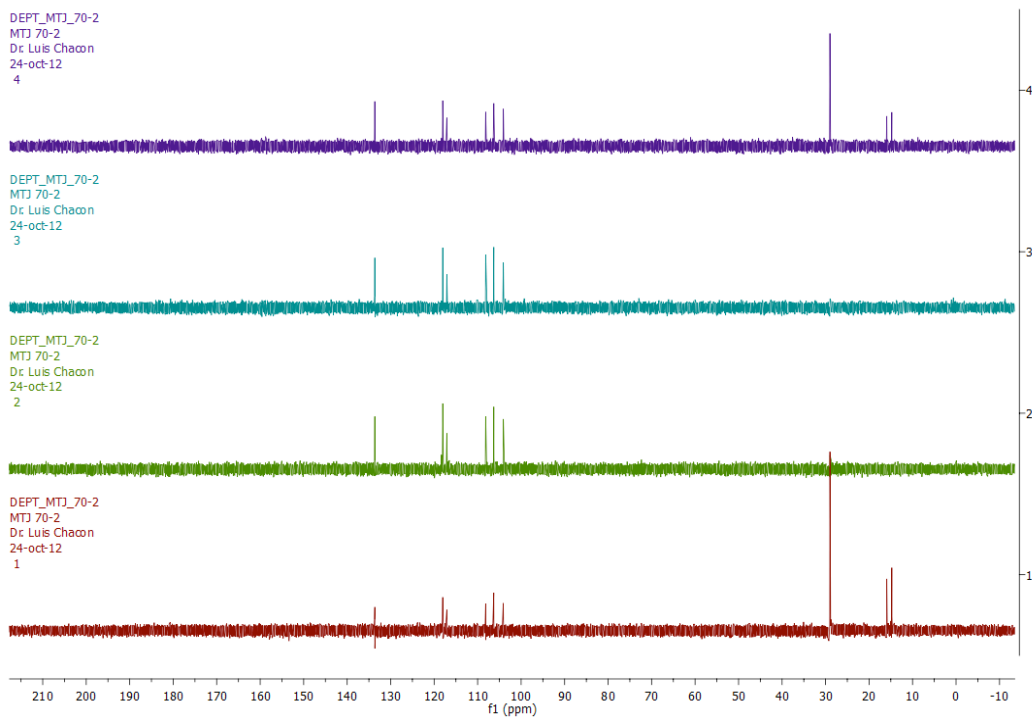

6. Dept NMR of 2 in  $\text{CDCl}_2$

[ Mass Spectrum ]  
Data : MOP259 Date : 04-Oct-2013 00:58  
Sample: OJ-MT Operator name Ing.Victoria Labastida G.  
Note : Dr.Mario Ordonez Centro de Investigaciones Quimicas UAEM  
Inlet : Direct Ion Mode : FAB+  
Spectrum Type : Normal Ion [MF-Linear]  
RT : 0.64 min Scan# : (6,7)  
BP : m/z 100.0000 Int. : 24.82  
Output m/z range : 40.0000 to 505.6973 Cut Level : 0.00 %

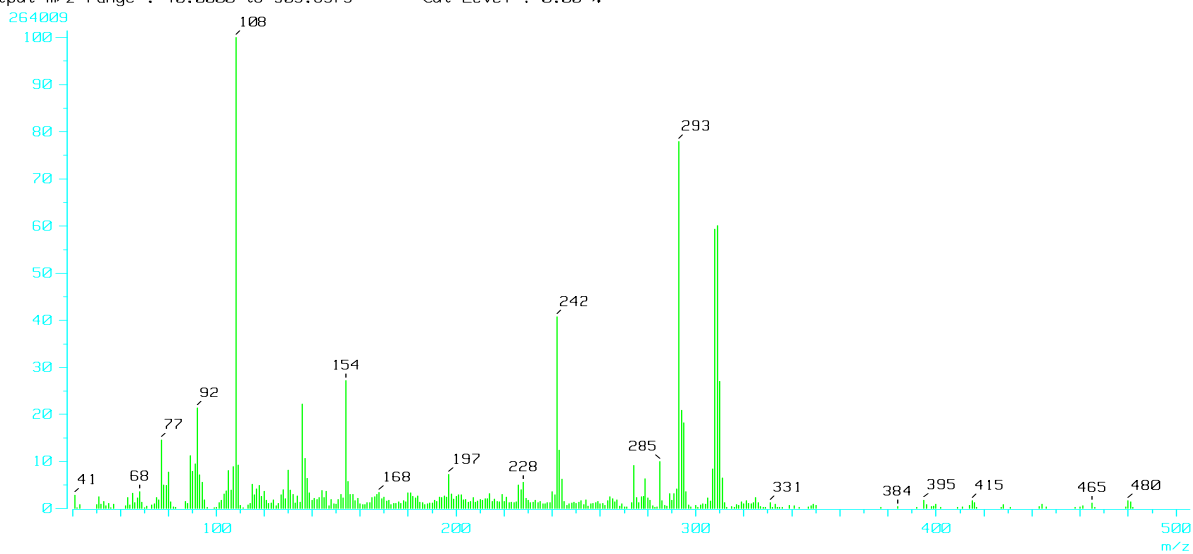

[ Elemental Composition ]

Data : MOP260 Date : 08-Oct-2013 00:53  
Sample: OJ-MT Operate name: Ing. Victoria Labastida G.  
Note : Dr. Mario Ordonez Centro de Investigaciones Quimicas UAEM  
Inlet : Direct Ion Mode : FAB+  
RT : 0.21 min Scan#: (2,8)+41  
Elements : C 40/0, H 49/0, O 2/0, N 2/0  
Mass Tolerance : 1000ppm, 3mmu if m/z < 3, 25mmu if m/z > 25  
Unsaturation (U.S.) : 10.5 - 10.5

| Observed m/z | Int% | Err[ppm / mmu] | U.S. | Composition       |
|--------------|------|----------------|------|-------------------|
| 309.1378     | 81.5 | -72.8 / -22.5  | 10.5 | C 19 H 21 O 2 N 2 |

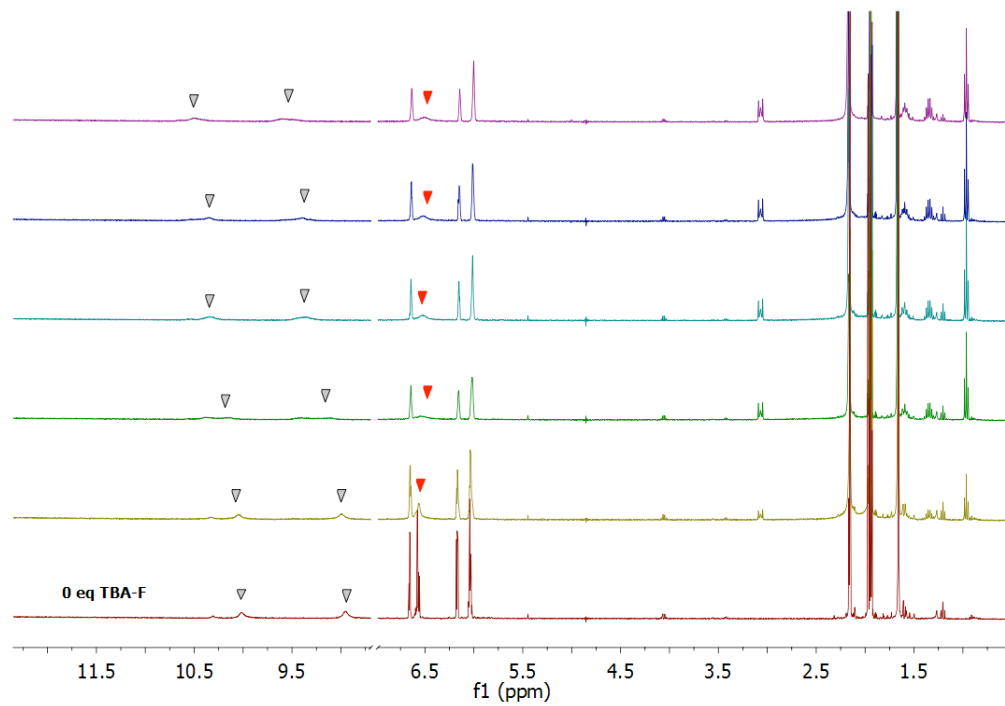

7.  $^1\text{H}$  NMR spectra (400 MHz) for titration of compound 2 with TBA-F in  $\text{CD}_3\text{CN}$ .

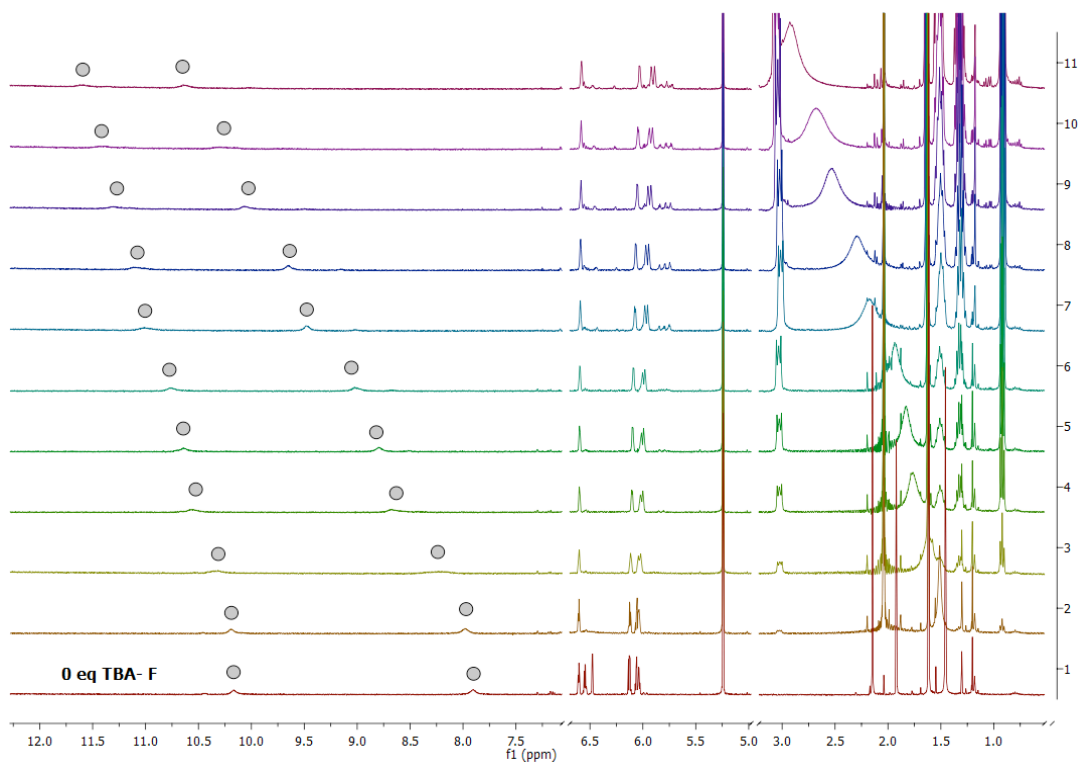

8. <sup>1</sup>H NMR spectra (400 MHz) for titration of compound 2 with TBAF in CD<sub>2</sub>Cl<sub>2</sub>.

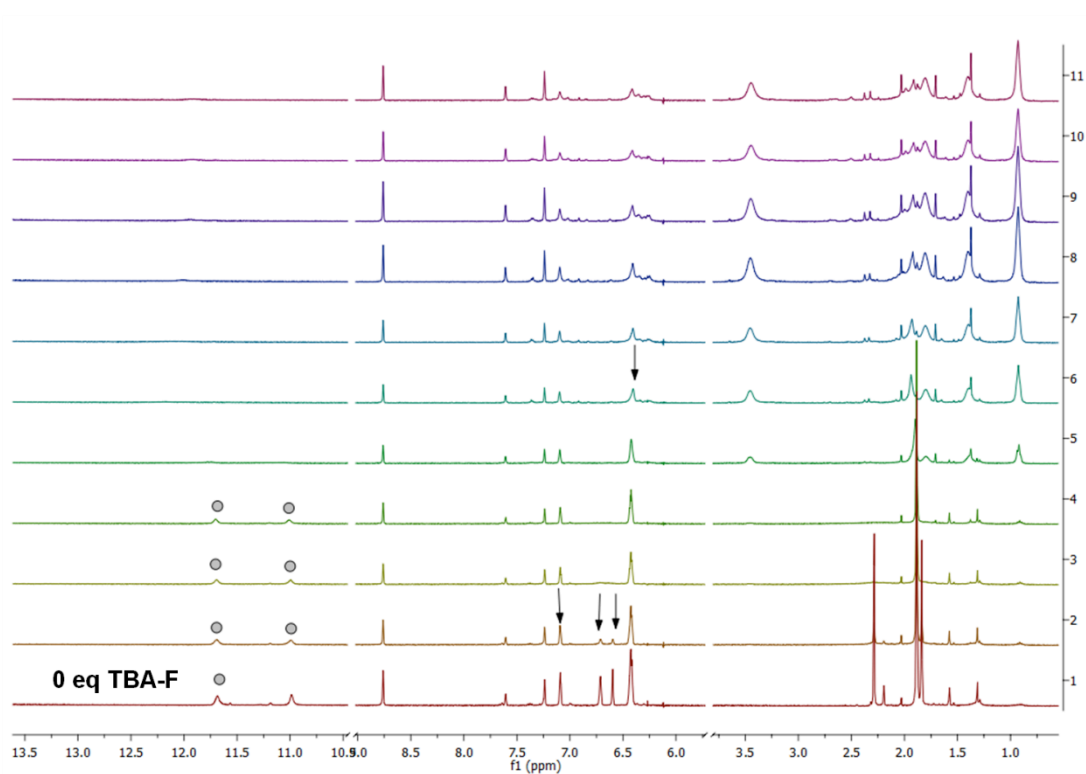

9. <sup>1</sup>H NMR spectra (400 MHz) for titration of compound 2 with TBAF in C<sub>5</sub>D<sub>5</sub>N.



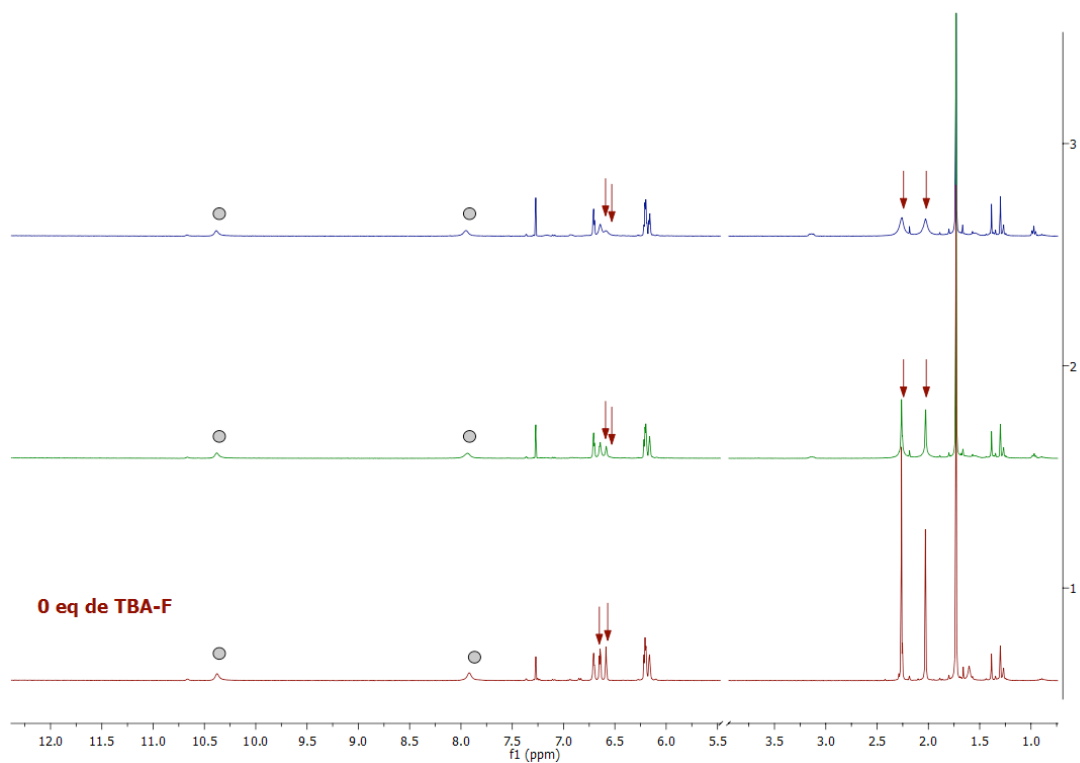

10.  $^1\text{H}$  NMR spectra (400 MHz) for titration of compound 2 with TBAF in  $\text{CD}_3\text{Cl}_3$ .

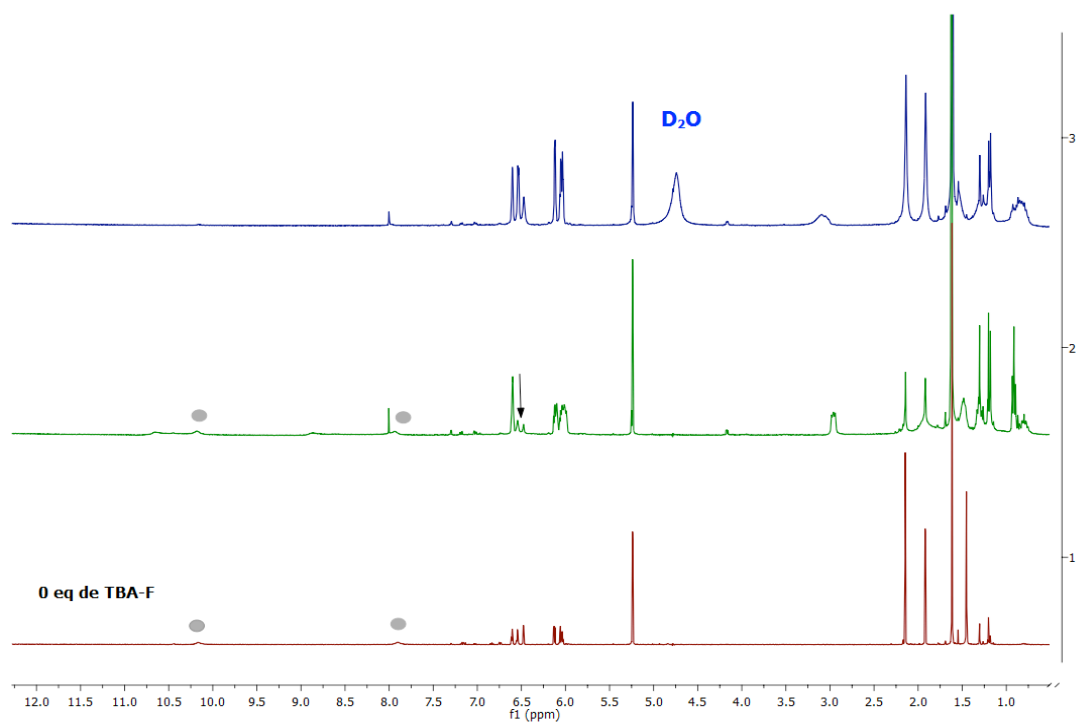

11.  $^1\text{H}$  NMR spectra (500 MHz) a) Compound 2. b) Compound 2- TBA- F c) Compound 2- TBA-F +  $\text{D}_2\text{O}$

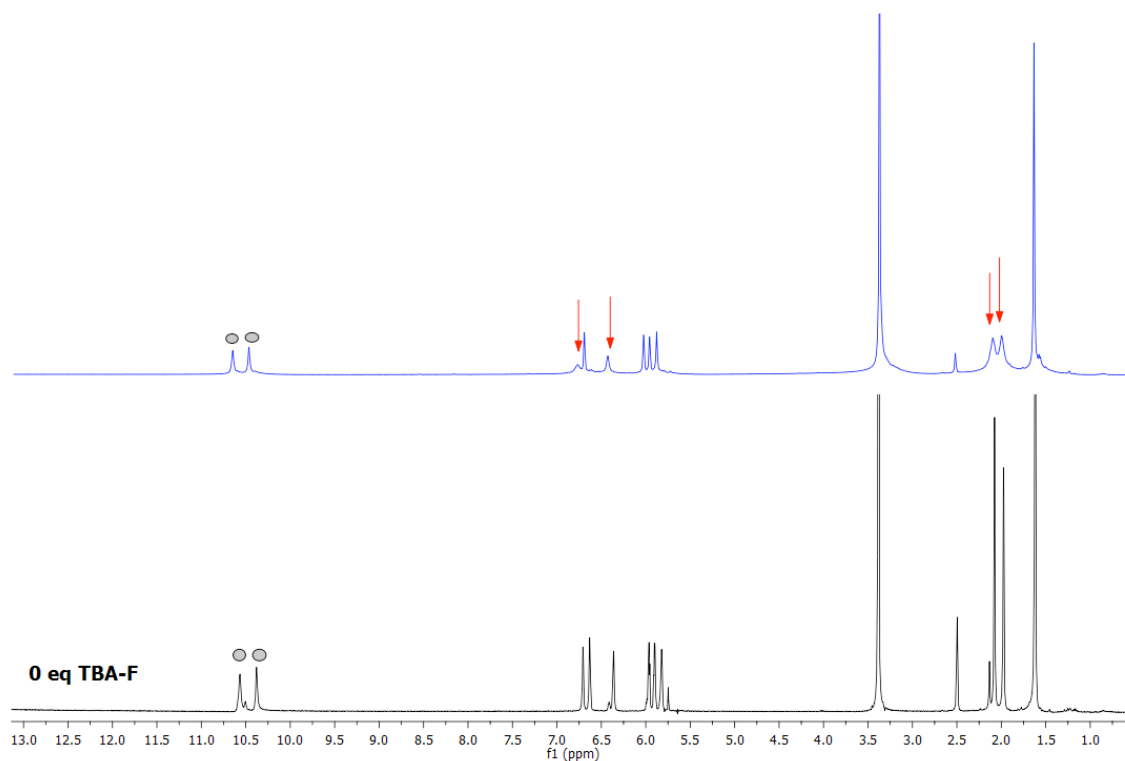

12.  $^1\text{H}$  NMR spectra (500 MHz) a) Compound 2 in  $\text{DMSO-d}_6$  b) compound 2 with 0.08 eq of TBA-F in  $\text{DMSO-d}_6$ .

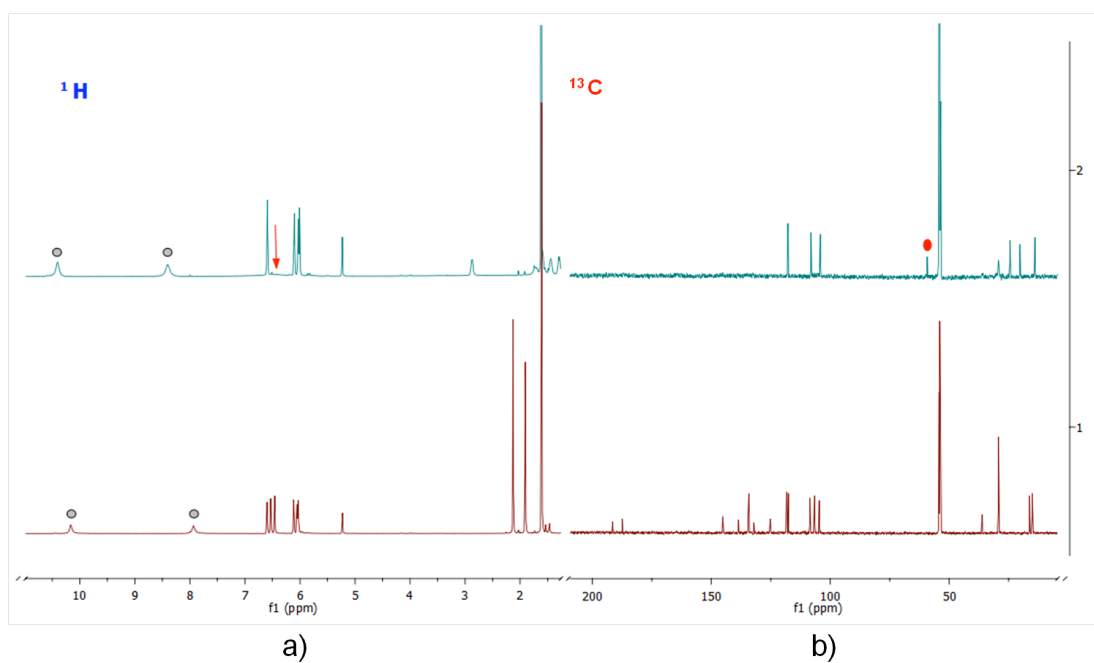

13.  $^1\text{H}$  NMR spectra (500 MHz) (a) of 2 (a-1) 2 with 0.08 eq TBA-F (a-2) in  $\text{CD}_2\text{Cl}_2$ . Red arrow: signal disappearance.  $^{13}\text{C}$  NMR spectra (b) of 2 (b-1) 2 with 0.08 eq TBA-F (b-2).

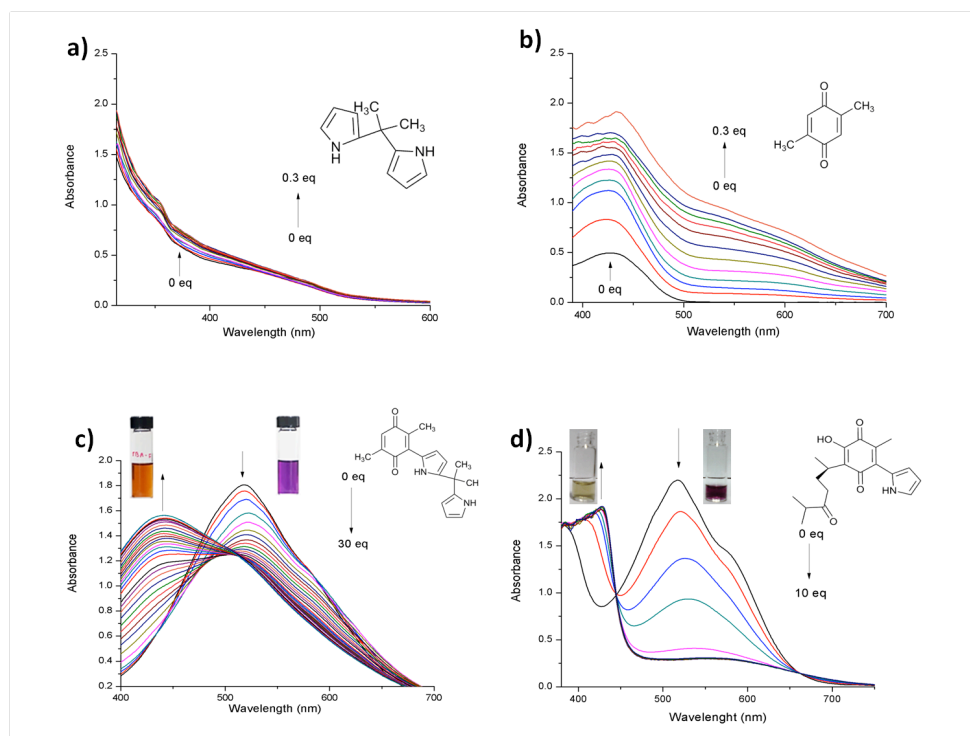

14. a) UV-Vis titration of Dipirromethane in  $\text{CH}_3\text{CN}$  ( $2 \times 10^{-2}\text{M}$ ) solution upon addition of fluoride ion as TBA salt (equiv = 0 - 0.3 eq.) b) UV-Vis titration of 2,5- dimethyl-1,4- benzoquinone in  $\text{CH}_3\text{CN}$  ( $2 \times 10^{-2}\text{M}$ ) solution upon addition of fluoride ion as TBA salt (equiv = 0 - 0.3 eq.) c) UV-Vis titration of 2 in  $\text{CH}_3\text{CN}$  ( $5 \times 10^{-4}\text{M}$ ) solution upon addition of fluoride ion as TBA salt (equiv = 0-30 eq) d) UV-Vis titration of 1 in  $\text{CH}_3\text{CN}$  ( $5 \times 10^{-4}\text{M}$ ) solution upon addition of fluoride ion as TBA salt (equiv = 0-10 eq).
